# Supplementary material for: Lacticaseibacillus rhamnosus Impedes Growth of Listeria spp. in Cottage Cheese through Manganese Limitation
Source: Foods. 2021 Jun 11;10(6):1353. doi: 10.3390/foods10061353 (PMC8230772; doi:10.3390/foods10061353)
Supplement: Supplementary file 1 [file foods-10-01353-s001.zip › foods-1227388-supplementary.pdf]

Supplementary Files to

# ***Lacticaseibacillus rhamnosus* impedes growth of *Listeria* spp. in cottage cheese through manganese limitation**

Lieke A. van Gijtenbeek<sup>1</sup>, Quinn Singer<sup>2</sup>, Louise E. Steffensen<sup>1</sup>, Shannon Neuens<sup>1</sup>, Helle S. Guldager<sup>1</sup>, Susanne Bidstrup<sup>1</sup>, Tina Høgholm<sup>1</sup>, Mikkel G. Madsen<sup>1</sup>, Kathleen Glass<sup>2</sup>, Solvej Siedler<sup>\*1</sup>

<sup>1</sup> Chr. Hansen A/S, Bøge Alle 10-12, Hørsholm DK-2970, Denmark

<sup>2</sup> Food Research Institute, 1550 Linden Drive, University of Wisconsin-Madison, Madison, WI, 53706, USA

\* Correspondence: dksosi@chr-hansen.com

**Table S1. Composition of manganese-deficient CDM-a and CDM-b.** All components were dissolved in MilliQ water as various stock solutions and mixed, after which the pH was set to 6.8 with KOH and the volume was adjusted to 1 L and filter-sterilized.

| Component                       | CDM-a    | CDM-b    |
|---------------------------------|----------|----------|
| <b>Basal components</b>         |          |          |
| Glucose                         | 27.76 mM | 27.76 mM |
| Sodium acetate                  | 15.24 mM | 12.19 mM |
| Ammonium citrate                | 2.47 mM  | 2.47 mM  |
| K <sub>2</sub> HPO <sub>4</sub> | 5.74 mM  | 14.35 mM |
| KH <sub>2</sub> PO <sub>4</sub> | 36.74 mM | 22.04 mM |
| NaHCO <sub>3</sub>              | -        | 4.83 mM  |
| Urea                            | -        | 2 mM     |
| <b>Amino acids</b>              |          |          |
| L-Alanine                       | 3.4 mM   | 0.90 mM  |
| L-Arginine                      | 1.1 mM   | 0.46 mM  |
| L-Asparagine                    | 0.8 mM   | 0.61 mM  |
| L-Aspartate                     | 0.8 mM   | 0.60 mM  |
| L-Glutamate                     | 2.1 mM   | 0.55 mM  |
| L-Glutamine                     | 0.7 mM   | 0.55 mM  |
| Glycine                         | 2.7 mM   | 1.07 mM  |
| L-Histidine                     | 0.3 mM   | 0.52 mM  |
| L-Isoleucine                    | 0.8 mM   | 0.61 mM  |
| L-Leucine                       | 0.8 mM   | 0.61 mM  |
| L-Lysine                        | 1.4 mM   | 0.55 mM  |
| L-Methionine                    | 0.7 mM   | 0.54 mM  |
| L-Phenylalanine                 | 1.2 mM   | 0.48 mM  |
| L-Proline                       | 2.6 mM   | 0.70 mM  |
| L-Serine                        | 2.8 mM   | 0.76 mM  |
| L-Threonine                     | 1.7 mM   | 0.67 mM  |
| L-Tryptophan                    | 0.5 mM   | 0.39 mM  |
| L-Tyrosine                      | 0.3 mM   | 0.44 mM  |
| L-Valine                        | 0.9 mM   | 0.68 mM  |
| Cysteine                        | 0.8 mM   | 4.13 mM  |

| Component                                                                           | CDM-a    | CDM-b    |
|-------------------------------------------------------------------------------------|----------|----------|
| <b>Vitamins</b>                                                                     |          |          |
| Biotin                                                                              | 0.41 µM  | 0.82 µM  |
| Folic acid                                                                          | 2.27 µM  | 0.45 µM  |
| Pyridoxal·HCl                                                                       | 9.82 µM  | 4.91 µM  |
| Riboflavin                                                                          | 2.66 µM  | 1.33 µM  |
| Thiamine·HCl                                                                        | 2.96 µM  | 1.48 µM  |
| Nicotinamide                                                                        | 8.19 µM  | 4.46 µM  |
| Cyanocobalamin                                                                      | -        | 0.37 µM  |
| p-Aminobenzoic acid                                                                 | -        | 3.65 µM  |
| Ca-pantothenate                                                                     | 2.10 µM  | 22.67 µM |
| Lipoic acid                                                                         | 9.69 µM  | 2.42 µM  |
| L-ascorbic acid                                                                     | 2.84 mM  | -        |
| Biotin                                                                              | 0.41 µM  | 0.82 µM  |
| Folic acid                                                                          | 2.27 µM  | 0.45 µM  |
| Pyridoxal·HCl                                                                       | 9.82 µM  | 4.91 µM  |
| Riboflavin                                                                          | 2.66 µM  | 1.33 µM  |
| Thiamine·HCl                                                                        | 2.96 µM  | 1.48 µM  |
| Nicotinamide                                                                        | 8.19 µM  | 4.46 µM  |
| <b>Bases</b>                                                                        |          |          |
| Adenine                                                                             | -        | 74.00 µM |
| Guanine                                                                             | -        | 66.17 µM |
| Uracil                                                                              | -        | 89.21 µM |
| Xanthine                                                                            | -        | 65.74 µM |
| <b>Metals</b>                                                                       |          |          |
| MgCl <sub>2</sub> · 6H <sub>2</sub> O                                               | 0.98 mM  | 0.98 mM  |
| CaCl <sub>2</sub> · 2H <sub>2</sub> O                                               | 0.34 mM  | 0.34 mM  |
| ZnSO <sub>4</sub> · 7H <sub>2</sub> O                                               | 17.39 µM | 17.39 µM |
| CoSO <sub>4</sub> · 7H <sub>2</sub> O                                               | 8.89 µM  | 8.89 µM  |
| CuSO <sub>4</sub> · 5H <sub>2</sub> O                                               | 10.01 µM | 10.01 µM |
| (NH <sub>4</sub> ) <sub>6</sub> Mo <sub>7</sub> O <sub>24</sub> · 4H <sub>2</sub> O | 2.02 µM  | 2.02 µM  |
| FeCl <sub>3</sub> · 6H <sub>2</sub> O                                               | 5.55 µM  | 5.55 µM  |
| FeCl <sub>2</sub> · 4H <sub>2</sub> O                                               | 12.58 µM | 12.58 µM |

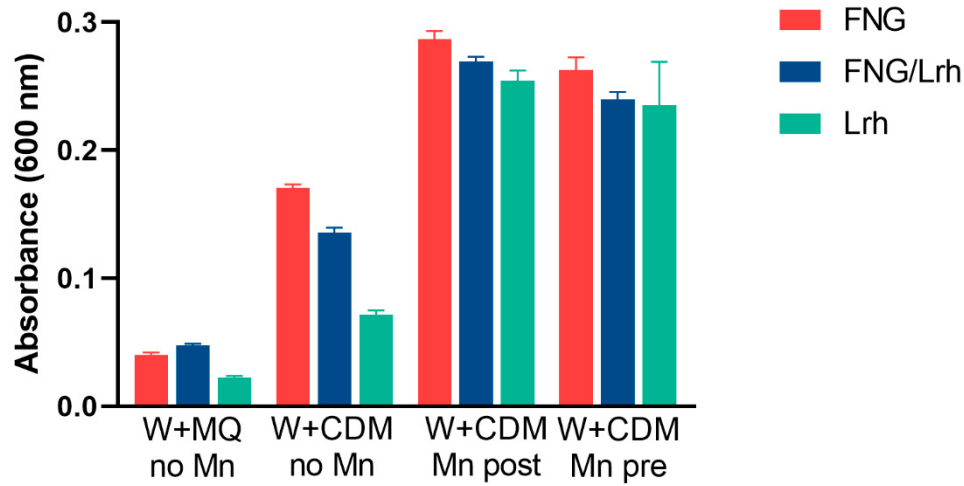

**Figure S1. Culture density of *L. innocua* grown for 20 hr in mixtures containing filter-sterilized whey of milk fermented with FNG, Lrh-FQ or both.** *L. innocua* BL 86-26 was grown in a pH-adjusted whey/MilliQ mixture (W+MQ, no Mn), a whey/CDM-a mixture (W+CDM, no Mn), a whey/CDM-a mixture supplemented with 6 mg/L  $\text{MnCl}_2$  (W+CDM, Mn post) or a whey/CDM-a mixture using whey obtained for milk to which 6 mg/L  $\text{MnCl}_2$  was added prior to fermentation (W+CDM, Mn pre). The whey was mixed in a 1-to-1 ratio with MilliQ or CDM, adjusted to a—for *L. innocua*—growth permissible pH of 6.0, filter sterilized, provided with 0.5% glucose, and inoculated with *L. innocua*. Incubation was carried out in a 96-well plate for 20 hr at 30°C. Shown are averaged absorbance values of pentaplicate measurements corrected using background values of blank medium controls.

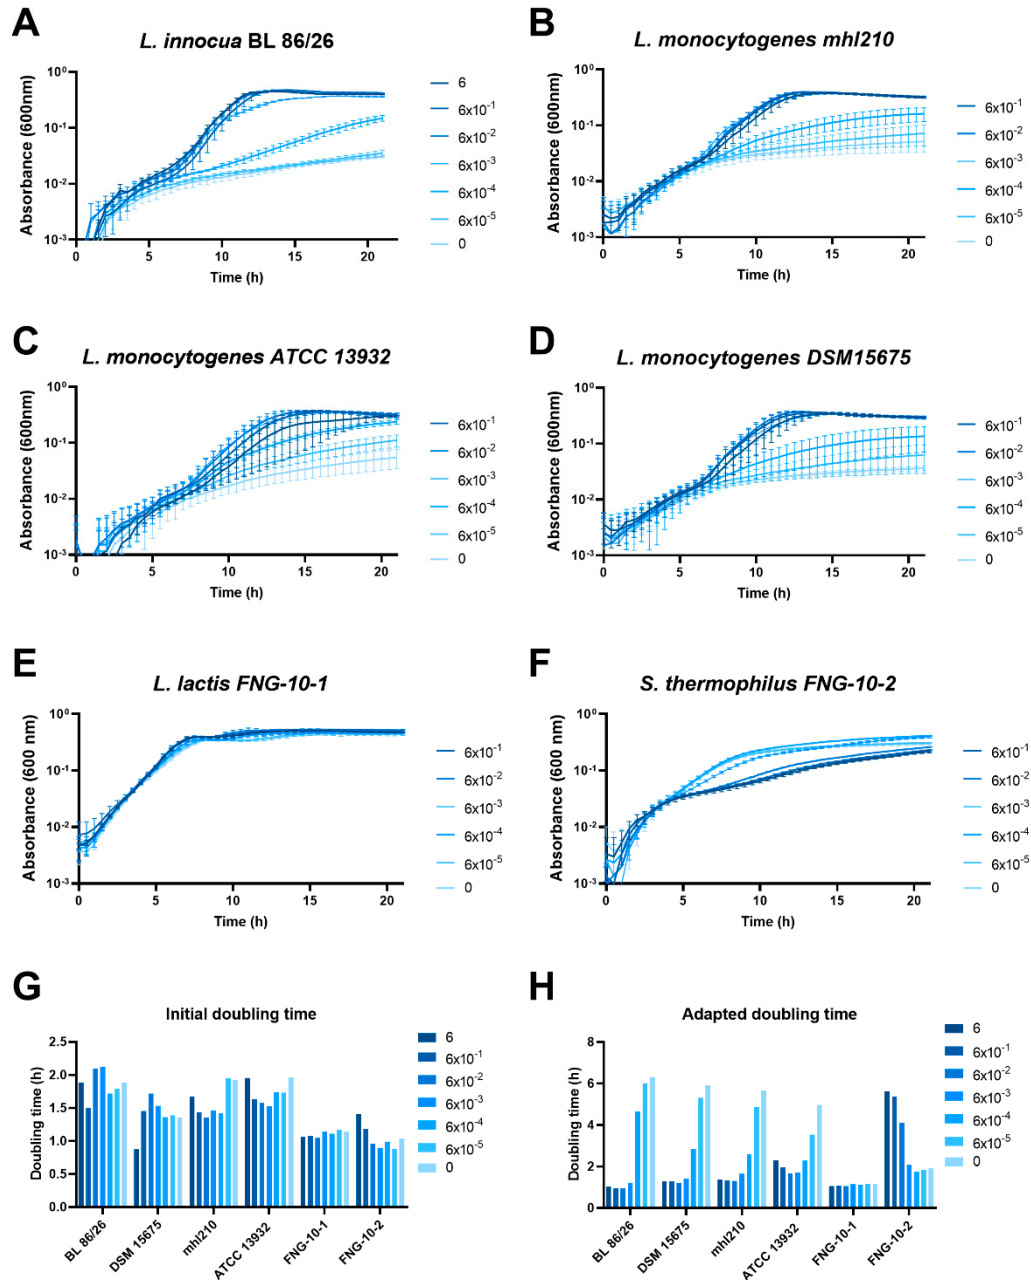

**Figure S2. The effect of Mn on the growth rate of various *Listeria* strains and two individual strains obtained from the FNG-10 starter culture. (A-F)** Growth curves of Li = *L. innocua*, Lm = *L. monocytogenes*, Ll = *L. lactis*, St = *S. thermophilus* in in Mn-free CDM supplemented with indicated MnCl<sub>2</sub> concentration (in mg/L). Depicted are corrected and averaged OD<sub>600</sub> values. All cultures were grown as standing 200-μL cultures 30°C in six-fold in 96-well plates covered with a transparent seal. Li, Lm, and Ll were grown in CDM-a, whereas St was grown in CDM-b. **(G)** Doubling times calculated over the initial period of growth during which cells pre-grown in in rich nutrient broth are adapting to CDM from pre-growth (derived from the 0-to-7 hr timepoints for *Listeria* strains, and from 0-to-3 hr timepoints for FNG strains). **(H)** Doubling times calculated after adaptation to manganese-depleted CDM (derived from >7 hr or >3 hr timepoints during exponential growth phase for *Listeria* strains or FNG strains, respectively).
